# Supplementary material for: TDP-43 dysregulation impairs cholesterol metabolism linked with myelination defects
Source: Research Square preprint supplement (doi:10.21203/rs.3.rs-6256163/v1), 2025-04-01
Supplement: Supplementary file 1 [file b79257fb23840fc3b0e902e1.docx]

**Supplementary Fig.**

**
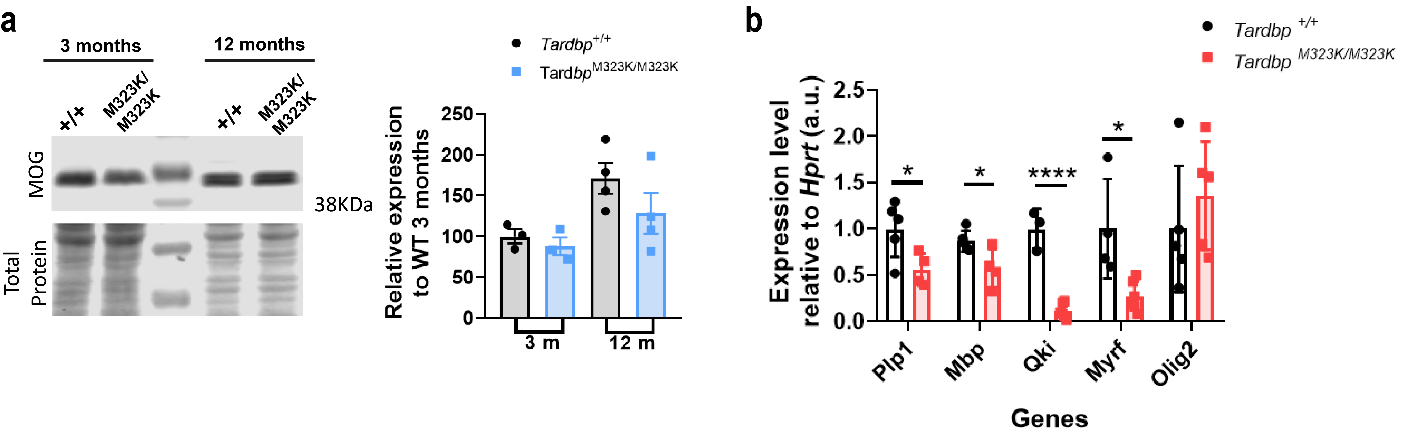
**

**Supplementary Fig. 1. (a)** Western blot analysis of MOG protein levels in frontal cortex samples at 3 and 12 months of age, with quantification relative to wild-type (WT) at 3 months. **(b)** Relative expression of myelin- and oligodendrocyte-related genes (*Plp1, Mbp, Qki, Myrf, Olig2*) normalized to *Hprt* in frontal cortex samples from *Tardbp+/+* and *TardbpM323K/M323K* mice. Experimental N per group: 3-5 *Tardbp+/+* and 3-5 *TardbpM323K/M323K*. Data are presented as mean ± SEM. *p < 0.05, ****p < 0.0001.

**
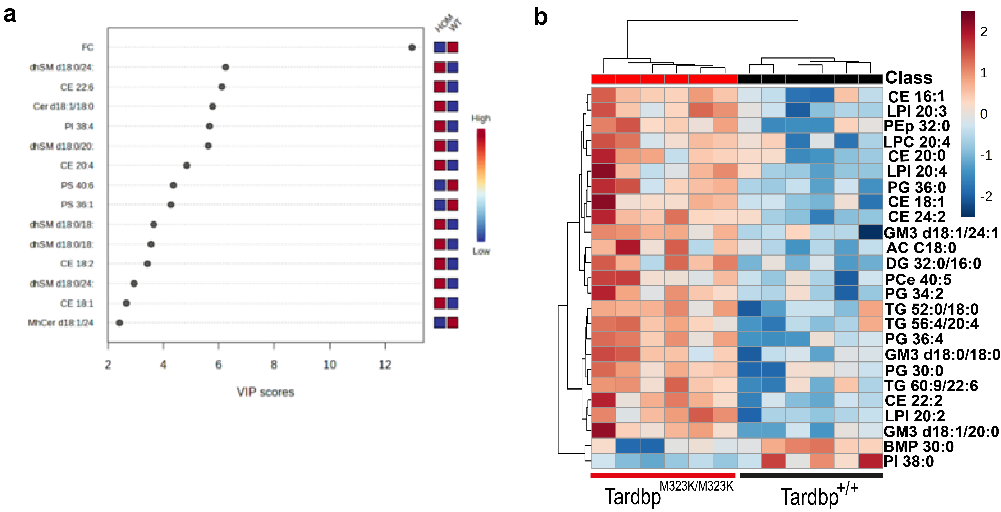
**

**Supplementary Fig. 2. (a)** Vip score **(b)**Heatmap representation of hierarchical clustering of individual samples according to the top 25 statistically significantly different lipid species.


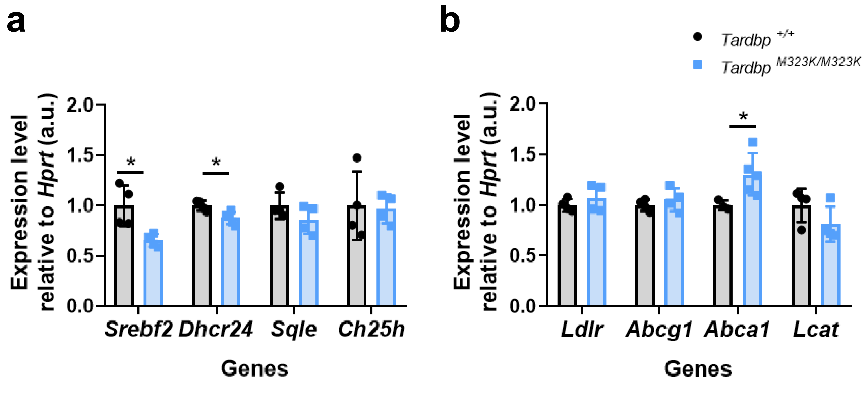


**Supplementary Fig. 3. (a)** Relative expression of cholesterol synthesis (*Srebf2, Dhcr24, Sqle, Ch25h*) and **(b)** cholesterol transport (*Ldlr, Abcg1, Abca1, Lcat*) normalized to *Hprt* in frontal cortex samples from *Tardbp+/+* and *TardbpM323K/M323K* mice. Experimental N per group: 4-5 *Tardbp+/+* and 3-5 *TardbpM323K/M323K*. Data are presented as mean ± SEM. *p < 0.05.
