# Supplementary material for: TDP-43 dysregulation impairs cholesterol metabolism linked with myelination defects
Source: Research Square preprint supplement (doi:10.21203/rs.3.rs-6256163/v1), 2025-04-01
Supplement: Supplementary file 2 [file f8b810e3c075a1dac65735ff.xlsx]

## Sheet: Supplementary Table 1
Genotyping probe
TDP-WT-FAM	CCGCAGCCATCATCG	5' FAM- '3 BHQ1
TDP-MUT-JOE	CGCAGCCTTCATC	5' JOE - 3' BHQ1
GEN	FORWARD PRIMER	REVERSE PRIMER
Sbref2	GCGTTCTGGAGACCATGGA	ACAAAGTTGCTCTGAAAACAAATCA
Sqle	GCGTTCTGGAGACCATGGA	ATATCCGAGAAGGCAGCGAAC
Ch25h	TGCTACAACGGTTCGGAGC	AGAAGCCCACGTAAGTGATGAT
Plp1	TGAGCGCAACGGTAACAGG	TTCCCAAACAATGACACACCC
Qki	GGAGTGCAGAATTGCCTG	CTAGGTCCAAGGATTCTCC
Myrf	CCGCATCAGCAGAACAAGTGGG	GCATCGTCGCCCACGGAAAAG
Olig2	TCCCCAGAACCCGATGATCTT	CGTGGACGAGGACACAGTC
Mbp	ATTCACCGAGGAGAGGCTGGAA	TGTGTGCTTGGAGTCTGTCACC
Hprt	AGTGTTGGATACAGGCCAGAC	CGTGATTCAAATCCCTGAAGT
Ldlr	TGACTCAGACGAACAAGGCTG	ATCTAGGCAATCTCGGTCTCC
Abcg1	GTACCATGACATCGCTGGTG	AGCCGTAGATGGACAGGATG
Abca1	GTGACCTATGTGCTGCCGTA	GAGCCGGTCATCAATCTCAT
Lcat	GTGGTTCCATCAAGGCCATG	TGCCCTGGTTGTCACCTGA

## Sheet: Supplementary Table 2
DEGs adjusted p-value
Gm53473
LOC132660285
Gm34857
Gid4
Blmh
4930481A15Rik
Stk38
Zfp992
9530057J20Rik
Gm52571
Tmem88b
Gm30883
Gm39326
Trim43a
Tspan2
Prr18
Gpr37
Lats1
Upk1a
Gm51535
Spop
Nmrk2
Fa2h
St18
Thsd4
Zfp933
Rpe65
Myrf
Mecr
Cldn11
Tex51
Gm36117
Gm36907
Mroh5
Myo1d
Dok3
Tshz2
Adamts4
Adam8
Cfap65
Ip6k3
Sod2
Gm36109
Slc39a2
Trim17
Col7a1
Trhr2
Ldhd
Rnf212b
Prr5l
Gm34982
Myo1a
Xylb
Ugt8a
Gm14827
Gm7061
Miip
Or2ak4
Pyroxd2
Zfp982
Stxbp2
Tmem63a
Chrnb3
Col4a1
Mobp
Abca8a
Gm17709
Gm41361
4930553P18Rik
Kif13b
Mal
Sec14l5
Dcst2
Gm39080
Lrrc51
Col4a2
Pcdhga11
Fndc8
Tbx1
Fcrl2
Plekhh1
Ermn
Amhr2
Ccdc148
9530062K07Rik
Cpsf4l
Masp2
Tyrp1
Dcdc2b
Pcdhga3
Tnfrsf25
Tmem125
Capn11
Prx
Mycbpap
Mog
Klhl4
Enpp6
Gm53497
Tmt1a3
Lrfn5
Edn1
Lcn2
Gm40164
Gm53405
Obp2b
Taf7l
Tnfrsf8
Gjc3
Bicd2
Gm41395
Pcdhga10
Ercc8
Dusp15
Neurod4
Col5a3
Plp1
Col15a1
Gm33207
Tmcc3
Ring1
Wnt10b
P3h3
Unc5b
Npff
Gmip
Rad21l
Otx1
Adamtsl4
Gp1bb
Pde10a
Rdh9
Gm35379
Trim72
LOC100861738
Aspa
Cnp
Plcl1
Tardbp
Trim59
Ankrd24
Gm42067
Arf3
Top1mt
Noxred1
Gm13293
2600014E21Rik
Gm34903
Eif4ebp3
A930017M01Rik
Anln
D2hgdh
Gm38651
Nmb
Xrn1
Thbs3
Pcdhga2
Afg3l1
Fgfr2
Tra2a
Ebf4
Gm51875
Gm11525
Thbs4
Itga10
Tekt2
0610009L18Rik
8430429K09Rik
Myo7a
Rbm12
Col5a1
Fhod1
Slc14a1
Tgfa
Rida
Sst
H3c15
Fhip2b
Dlec1
Trf
9230112J17Rik
Gngt2
Ly6a
Gm53385
Arhgef10
Galnt6
Mapk12
Scaper
Gm5820
Mlph
Myrfl
Gm30502
Cort
Slc44a1
Zfp180
Cpm
Gm26777
Mcam
Pcdha5
Dglucy
Npy
Gm46514
Gm46846
C2
Cntn2
Plxnb3
Pcdhga12
Spag8
Cdcp1
Gm52041
Cbs
Tmc4
Sds
3222401L13Rik
Pcdhga8
Gm31793
Cfp
Gm30366
Trit1
Zfp536
Mir124-2hg
Gm43305
Mfap2
Adam15
Gask1b
Lsp1

## Sheet: Supplementary Table 3
List Lipid Genes (“lipid metabolic process” (GO:0006629) and “lipid transport” (GO:0006869))
Nr1d1
Gpaa1
A0a1b0gv83
Agpat3
Ldah
Atg14
Alg9
Serinc1
Tspoap1
Vapb
Sbf1
Adtrp
Nfe2l1
Mt3
Atp5f1a
Fgf1
Pigh
Fdx2
Pde3a
Csnk2b
Gk2
Gk3p
Plbd1
Hmgcl
Hpgd
Pdxdc2p
Far2
Acsm6
Plcxd2
Cacna1h
Mtm1
Hsd17b2
Hsd17b3
Angptl3
Cyp7b1
Ptgr1
Adh1a
Acsf2
Mapk3
Hacd1
Inpp5b
Pdxdc1
Nrbf2
Plin5
Impad1
Cds2
Sin3b
Pld4
Dgat1
Appl2
Ache
Socs5
Ip6k2
Naga
B4galt5
Inpp1
Grhl1
Inpp5f
Coq2
Aldh1a3
Thra
Lias
Lypla1
Crls1
Acsbg1
Pnpla2
Pik3r3
Sult1b1
Tpte2
Plppr2
Pik3cb
Hacl1
Olah
Egfr
G0s2
Hacd2
Gpx1
Cryl1
Vapa
Acer2
Ctdnep1
Sgpl1
Large1
Lpin1
Ncoa6
Efr3b
Slc44a5
Inpp5a
Pigl
Fdxr
Pdpr
Gdpd4
Gal3st3
Slc16a11
Rab5a
Rab4a
B4galt6
Daglb
Vav2
Ccr7
Cyp2a7
Cyb5r3
Cckbr
Lipf
Aldh1a1
Cyp3a5
Cers1
Edn2
Igfbp7
Adh1c
Adh1b
Mtmr8
Cyp2r1
Gpc6
Abhd16a
Fads2
Snai1
Bpnt1
Ipmk
Ndufs6
Prkag3
H2afy
Mlycd
Mpdu1
Urs00005bbc98_9606
Urs00004e4ad0_9606
Urs000075d261_9606
Urs00001f4e81_9606
Pik3c3-Atg14_Human
Etfa-Etfb_Human
Pik3c3-Uvrag_Human
Gba3
Dkkl1
Sel1l
Mtmr14
St3gal6
Pla2g15
Trpv1
Htr2c
Adh6
Acadl
Tgfb1
Chat
Pex2
Pdgfb
Sec14l2
Pigo
Eef1a2
Pik3r5
Ghsr
Gdpd3
Dhcr24
Lipa
Fgfr1
Acot12
Enho
Alox12
Aoah
Acadm
Fa2h
Msmo1
Cnr1
Plcg2
Pik3cg
Hsd17b12
Agk
Ugt2b7
Ptk2
Far1
Sf1
St8sia1
Cpne1
B3galt1
Ormdl2
Tysnd1
Lgals12
Aldh3b2
Pip4k2a
Ccn1
Sirt4
Fut6
Gnb3
Pip5k1a
Sdr42e1
Npas2
Ccl19
Cga
Ces3
Ankrd1
Enpp7
Nr5a2
Flt3
Enpp6
Agrn
Pik3r2
Lclat1
Dhrs11
Pik3c2a
Erlin2
Lpcat2
Clcn2
Pik3r4
Plcz1
Rho
Lgmn
Clpsl2
Gper1
Neu1
Dolpp1
Serpina6
Srd5a2
Thnsl2
Nkx1-1
Pdss2
Comt
Cbr1
Sult2b1
Ptgs1
Cyp2j2
Acad11
P2rx1
Rubcn
Adh4
Carm1
Them5
Lsr
Gdpd2
Acox1
Slc44a2
Snx17
Pnpla4
Apobec1
Lonp2
Ptgds
Plcb2
C1qtnf2
Alas1
A0a087x0b3
Acbd5
Aldh1a2
Dhh
Idi2
Pecr
Angptl4
Lpcat4
Ppargc1a
Gbgt1
Wdtc1
Cers5
Ugt2b10
Tmem150a
Prkd3
Pigf
Helz2
Plch1
Acot4
Ndufab1
Fads6
Socs6
Socs3
Dgka
Socs7
Socs2
Cln6
Plaat2
Cnep1r1
Pigs
Trib3
Dpm3
Elovl2
Pnpla1
Alg12
Prkce
Serinc2
Ptgr2
Plpp3
Plpp1
Plp1
Pdp2
Pi4kap1
Gpc1
Smpd3
Fig4
B4galnt1
Pm20d1
Alg8
Srd5a1
Hibch
Tiparp
Aasdh
Plaat3
Pias4
Plppr1
Gata6
Gpd1l
Pex7
Gpld1
Pigb
Tmem86a
Pigc
Lpin2
Myo5a
Inpp5d
Abhd12
Nr4a3
Ppp4r3b
Etnk1
Pld6
Nfyc
Plppr4
Cyp2c19
Cyp2c18
Pi4k2b
Wdr91
Plcl1
Htr2a
C3
Serpina3
Cds1
Gdpd5
Cyp4a22
Mppe1
Crat
Gcdh
Gfi1
Mgll
Pex13
Tm7sf2
Atp5f1b
Acly
Nsdhl
Inpp5j
Etfb
Ptdss1
Hsd17b10
Fshb
Gal3st1
Sdc4
Cept1
Ptpmt1
Gla
Rgn
Plcxd3
Nr0b2
Awat2
Chpt1
Abhd15
Gpat3
Pik3c2g
Lepr
Gpx4
Srebf1
Rdh10
Prlr
Dgkb
Faah
Abhd3
Ptprn2
Angptl8
Rack1
Abhd5
Nr0b1
Morc2
Ebp
Pmvk
Sp1
Gba2
Ins
Ces2
Nsmaf
Phospho1
Pigk
Gpam
Por
Sgpp2
Hexa
Lpl
Akr1d1
Cyp2a6
Zp3
Mvd
Crppa
Nr1i2
Gpc2
Lhb
Ormdl3
Acox2
Aldh3b1
Pc
Pafah2
Vdr
Insig1
Cd74
Pdp1
Rgl1
Acot7l
Sts
Pnpla7
Ormdl1
Ephx2
Wwox
Gde1
Fgr
Phyh
Arf3
Cav3
Eif6
Acat2
St8sia5
Mgst3
Pld1
A0a286yez7
Pde3b
Cyp26c1
Plcb3
Ocrl
Hao2
Elovl5
Tecr
Nceh1
Clps
A0a286yes4
A0a286yf41
Adipor2
Aacs
Sesn2
Gpat4
Prkd2
Tbl1xr1
Mvk
Cyp2d7
Acsm5
Cers3
Retsat
Psapl1
Gpat2
Rbl2
Acot1
Cyp2f1
Ttc7b
Lactb
Mtmr3
Mtmr2
Mtmr1
Mboat2
Aspg
Pip5kl1
Alg10
Tbl1x
Smpd2
Tgs1
Alox15b
Gal3st4
Lmf1
Fgf23
Sptlc2
Sptlc1
Nr2f2
Cyp3a7
Gdpd1
Bbs4
Elovl4
Csnk2a2
Oxsm
Gnpat
Dhrs4
Prkaa1
Rest
Gk5
Pi4k2a
Ehhadh
Ucp3
Gc
Afp
Edf1
Mcee
Inpp4a
Dgat2
Acer3
Ip6k3
Plcxd1
Decr2
Plppr3
Prlh
Crabp1
Pigv
Ugt1a9
Slc35c1
Pnliprp3
Gstp1
Dgat2l6
Echdc1
Plcd4
Pigq
Cyp4f8
Fam3a
Lrp2
Hspg2
Srd5a3
Fabp5
Ggt1
Tnfrsf1a
Hmgcs2
Them4
Cyp17a1
Cidea
Pikfyve
Rbp1
Aig1
Pla2g7
Cpne7
Degs1
Agpat2
Prpf19
Src
Mtmr9
Ech1
Alkbh7
Lipi
Etnk2
Hsd17b1
Hsd3b1
Dpm1
Hpgds
Atm
Cyp39a1
Elovl1
Sct
Gip
Fdps
Mtmr4
Sphk1
Crem
Sin3a
Rufy1
St6galnac5
Dld
Ptdss2
Pdgfrb
Cyp2s1
Gstm4
Rab14
Hdac3
Inppl1
Tbxas1
Pdgfa
Cln3
Nr5a1
Fuca1
Dhrs2
Cat
Hmgcr
Abhd1
Acsm2b
Acot7
Csnk2a1
Serpina12
Nod2
Pip4k2c
Agps
Alox15
Mcat
Jazf1
Sgms1
Ip6k1
Auh
Enpp2
Rorc
Cyp4f11
Rdh11
Tpra1
Rdh14
Mmaa
Tiam2
Etnppl
Pigx
Prxl2b
Mogat3
St8sia6
Serinc5
Pigz
Bco1
Pigg
Ugt1a8
Ugt1a7
Cyp3a43
Acot11
Itgb8
Lta4h
Cyp4v2
Aloxe3
Fam126a
Alpi
Alox5
B3gnt5
Ggt5
Wnt4
Hsd17b13
Dgkz
Fads2p1
Plcd1
Csnk1g2
Serinc3
Pip4k2b
Asah1
Cecr5
Rab7a
Ugt2b28
Dhdds
Pip4p1
Tmem86b
Hacd3
Ebpl
Scd5
Hsd11b2
Pafah1b2
Hsd11b1
Cbr4
Btn2a1
Zadh2
Abo
Pitpnm3
Bco2
Fitm1
Slc44a3
B3galt4
Pip4p2
Pgp
Glt6d1
Cdk4
Slc16a1
Rdh5
Cers4
Il1rn
Akr1b15
Wnt10b
Sdr16c5
Echdc2
Ifng
Rbl1
Alg11
Iah1
Nkx2-1
Lrcol1
Me1
Glb1
Ddhd2
Pik3cd
Fam126b
Agap2
Etfbkmt
Pdgfra
Plpp6
Pnpla6
Creb1
Avp
Acads
Hcar2
Hsd17b4
Gpc3
Pcyt2
Aldh5a1
Sirt2
Dgkh
Pla2g4d
Mecp2
Gsta1
Awat1
Plaat1
Ivd
Ptges3
Hsd3b2
Ppp2r5a
Pon3
Pon2
Plcb4
G6pc
Irs1
Pck1
Zbtb20
Pld2
Ugt1a3
Acer1
Ccdc3
Pank2
Ttr
Sult4a1
St6galnac6
Sptssa
Nfyb
Etfa
Sacm1l
Chd9
Pigt
Pgap1
Scap
Fbxw7
Cyp2e1
Cyp1a2
Znf202
Tfcp2l1
Pccb
Pcca
Lpgat1
Isyna1
St6galnac4
Ppp2ca
Il4
Cyp11a1
Cd19
Sftpb
Plcb1
Ang
Plaat5
App
Atp6v1b1
St8sia2
Ptk2b
Atp1a1
Elovl6
Pbx1
Galc
Arsa
Elovl7
Pipsl
Clpsl1
Asah2
Ugt2b15
Ambra1
Degs2
Ppp2r1a
Acadsb
Bcl11b
Wdr81
Sphk2
Fam135a
Fhl2
Plb1
Scarf1
Efr3a
Tek
Adh7
Lrp8
Opa3
Acox3
Lpcat3
Inpp5e
Cwh43
Sik1
Pigp
Acss1
Hnf4a
Sdr42e2
Acsbg2
Cyp27b1
Rora
Sdc2
Mogat1
Tpp1
Hsd17b6
Ptgs2
Gba
Cerk
Cdipt
Impa2
Adm
Cyp24a1
Sult1a2
Sult1a1
Fpr2
Pten
Acod1
Inpp5k
Id2
Tm6sf2
Adra2a
Chrm5
Mboat1
Agmo
Klf4
Rubcnl
Pla2g4c
Sla2
Ppt1
Prkag1
Aadac
Pip5k1c
Dgat2l7p
Agpat4
Faah2
Samd8
Mtmr12
Cers6
Pign
Selenoi
Cyp26b1
Plcg1
Fgf21
Cyp8b1
Acss2
Pik3r6
St3gal5
Plagl2
Sult1e1
St8sia3
Cyp7a1
Tyrp1
Alox12b
Gpx5
Pemt
Dhcr7
Pyurf
B3galt2
Dkk3
Cyb5r2
Stoml2
Sh3yl1
Plaa
P2ry12
Dab2ip
Fmc1
Csf1r
Mapk14
Esr1
Acaa2
Rpe65
Adipor1
Hao1
Hacd4
Acot2
Acp6
Acadvl
Fdx1
Xbp1
Cebpa
A4galt
Cpne3
Gpcpd1
Impa1
Slc45a3
Dgki
Dhrs3
Lipm
St3gal4
Pla2g4b
Asah2b
Pex11a
Pigu
Sult2a1
Rlbp1
Pigm
Alg13
Mlxipl
Acsm4
Gal3st2
Acbd3
Ttc7a
Dgkd
Malrd1
Dpagt1
Pnliprp2
Pnliprp1
Fgfr4
A0a0g2jqs4
Idh1
Sult1a4
Dgkg
Sc5d
Faxdc2
Fut7
Acsl5
Fut5
A0a1b0gu76
Pik3r1
Decr1
Cyp2a13
F2
Cyp1b1
Ajuba
Pdk4
Ptgis
Lipk
Taz
Lipn
Htra2
Pcyt1a
Dhrs7b
Hsd3b7
Ugt2b17
Lpin3
Crebl2
B4galt4
B4galt3
Ptges2
Rdh12
Acaa1
Acad9
Trex1
Bmp2
Pnpla3
Opn1sw
Lyn
Plcl2
Dolk
Hsd17b14
Dhrs9
Pibf1
V9gyw3
Cubn
Fads1
Fgf2
Crabp2
Pgs1
Fgfr3
Flt1
Stub1
Akr1b10
Plpp4
Cerkl
Alg2
Cyp11b2
Htd2
Hexb
Neu3
Txnrd1
Ugt8
Ltc4s
Plekha4
Cyp51a1
Pam
St3gal2
Hadh
Pck2
Serinc4
Cyp21a2
Cyp3a4
Naaa
Acsf3
Plce1
Cyp27c1
Idi1
Rdh8
Pi4kap2
Nfya
Sdc1
A0a087x1b8
Pigw
Pla2g4e
Plek
Pnpla5
Sorbs1
Hint2
Cd81
Fitm2
Fabp12
Gstm2
Gpc5
Liph
Ephx3
Lipe
Rarres2
Mgst2
Agpat1
Ncor2
Neu4
Brca1
Pafah1b1
Cygb
Vac14
Acsm3
Slc44a1
Twist1
Acsm2a
Acsm1
Med1
Rb1
Slc44a4
Pla1a
Scd
Insig2
Pik3c2b
Prox1
Crebbp
Fut3
Egr1
G6pd
Gpd1
Lss
Nkx2-3
Ccl21
Adh5
Dgkk
Plekha1
V9gy18
Plcd3
Scpep1
Aldh3a2
Cyp2c9
Synj1
Tecrl
Alg6
Pisd
Dnajc15
Etfdh
Acot6
Fads3
Ran
Pi4ka
Oma1
Mtor
Pik3ca
Stard3nl
Akr1c3
Fgf19
Pcyt1b
Ggps1
Cpne6
Nr1d2
Kpnb1
Zmpste24
Sptssb
Pik3ip1
Ddhd1
Dgke
Acad10
Cyb5r1
Nudt7
E9pam4
Pgap3
Prkab1
Pik3c3
Plpp5
Cers2
Neu2
Cnbp
Eci1
Bscl2
Sult1a3
St6galnac3
Plin1
Sdc3
Hsd17b8
Plch2
Cyp26a1
Alg10b
Lbr
Mbtps1
Hadha
Galr2
Lgals13
Slc22a4
Sod1
Cyp2b6
Gstz1
Dbi
Th
Ch25h
Ywhah
Ppm1l
Alg1
Amacr
Tamm41
B4galnt2
Pgap2
Gpc4
Ddx20
Snca
Erlin1
Mmut
Cyp2d6
Cyp2c8
Sgms2
Rdh16
Ctsa
Bmp5
Plbd2
Fabp9
Alg14
Abhd2
Cyp27a1
Ptges
Cyp1a1
Tmem38b
Cyp4f3
Rbp2
Bax
Ccdc71l
Rbp3
Fasn
Kit
Plpp2
Akr1c2
Eci2
Tnfrsf21
Smpd1
Kdsr
Snai2
Dgkq
Akr1b1
Ptpn13
Echs1
Mboat7
Prdx6
Cish
Hsd17b7
Nudt19
Baat
Inpp4b
Pip5k1b
Qki
Smarcd3
Smg1
Acoxl
Trerf1
Pdss1
Synj2
Per2
Sptlc3
Hmgcs1
Akr1c8p
Agpat5
Bmx
Glyatl2
Cps1
Prkar2b
Adgrf5
A0a0g2jru3
Mogat2
Tnf
Washc1
Fam57b
Htr2b
A3galt2
Hadhb
Prkd1
Crtc3
Pdk3
Pdk2
Pdk1
Pafah1b3
Dpm2
Glipr1
Cyp4f12
Alg3
Opn1mw
Opn1lw
Mecr
Cyp2g1p
Bdh2
Abhd6
Smpd4
Crkl
Crk
Smpdl3b
Hmgcll1
Plekha2
Naa40
Elovl3
Cyp2u1
Gpihbp1
Pld3
Abhd4
Napepld
Plppr5
Ces5a
Acot8
Plaat4
Fabp7
Acat1
St8sia4
Socs1
Pi4kb
Aldh8a1
B3galnt1
Capn2
Ugt1a1
Urs000075b66e_9606
Lpcat1
Dagla
Mbtps2
Ugt2b11
Gk
Cyp46a1
Chkb
Pigy
Lipt1
Ces4a
Mtmr6
Mtmr7
Avpr1a
Piga
Lypla2
Adora1
Fdft1
Rab38
Abcd2
Sccpdh
Arf1
Epha8
Cyp3a7-Cyp3a51p
Hsd17b11
Sqle
Rdh13
Alox5ap
Lipj
Fam135b
Sumf1
Erg28
Sumf2
Golm1
Acsl6
Acad8
Vav3
Cyp11b1
A0a0g2jpk8
Ces1p1
Zfp69
Slc27a1
Lrat
Prkaa2
Sirt1
Akr1c4
Prkab2
Osbpl5
Stard10
Slc27a5
Slc27a6
Abca1
Apom
Apobr
Proca1
Psap
Scp2d1
Cln8
Atp8b1
Ttc39b
Akr1c1
Prkag2
Ncor1
Vapa-Osbp_Human
Ldlr
Prkcd
P2rx7
Adipoq
Abcd3
Pitpnb
Cd36
Apoa5
Lipg
Ncoa2
Cptp
Plin2
Tex2
Osbpl1a
Cpt2
Pnlip
Disp3
Abcd1
Hdlbp
Cpt1c
Agt
Akt1
Ncoa1
Shh
Pitpnm1
Scarb1
Cetp
Sorl1
Cyp19a1
Crh
Acsl1
Thrsp
Apol5
Stra6
Gltp
Cav1
Pla2g10
Pla2g3
Apob
Pla2g2f
Pla2g12a
Osbpl6
Osbpl7
Osbpl8
Abca2
Esyt2
Rxra
Nr1h4
Nr1h3
Mif
Vldlr
Chka
Rbp4
Apoh
Plscr1
Acaca
Npc1
Apoc3
Apoc2
Apoc1
Apoa2
Apoe
Pla2g4f
Osbpl9
Nfkb1
Cel
Gps2
Spns2
Cpt1b
Lep
Apof
Abca4
Fabp6
Cyp4f2
Pla2g2a
Pitpnm2
Mttp
Lrp10
Il1b
Npc2
Apoc4
Slc27a2
Fabp4
Cpt1a
Oc90
Drd3
Srebf2
Mfsd2a
Cyp4a11
Pla2g12b
Apod
Pla2g2d
Esyt3
Slc27a4
Soat1
Apol1
Pla2g1b
Anxa1
Lrp1
Ceacam1
Stard7
Clu
Lamtor1
Slc25a17
Osbpl2
Pla2g2c
Serac1
Mid1ip1
Soat2
Pnpla8
Plekha8
Star
Gal
Ttpa
Fabp2
Pctp
Apol2
Pla2g5
Acsl4
Irs2
Gm2a
Apol4
Agtr1
Tnfaip8l3
Osbpl3
Fabp3
Ppard
Erfe
Pla2g2e
Lpa
Sgpp1
Abcb4
Akt2
Lipc
Acacb
Pitpna
Apoa4
Pltp
Nr1h2
Ces1
Nus1
Stard4
Col4a3bp
Spp1
Pla2g4a
Acsl3
Pon1
Fabp1
Osbp
Bmp6
Npc1l1
Lima1
Lcat
Ppara
Cftr
Slc27a3
Ptpn11
Abcg1
Apoa1
Pla2g6
Esyt1
Plekha3
Ldlrap1
Osbpl10
Arv1
Scp2
Stard3
Tspo
Abcb11
Pparg
Crot
Pcsk9
Edn1
Ugcg
Plscr2
Plscr3
Bdkrb2
Slc51a
Fzd4
Map2k6
Gramd1a
Atp11b
Ano9
Abca11p
Triap1
Abcg4
Lcn12
Got2
Atp8a1
Rft1
Nfkbia
Tac1
Slc10a4
Atp9b
Tmem256-Plscr3
Vps4b
Anxa2-Pcsk9_Human
Ghrl
Pomc
Oxt
Egf
Atp8b4
Gramd1c
Xkr4
Ano7
Abca3
Sigmar1
Slco2b1
Abcc2
Abca8
P2rx4
Slco3a1
Sftpa1
Lcn1
Gramd1b
Rps6kb1
Osbpl11
Slc5a8
Inhba
Stoml1
C2cd2l
Agtr2
Prelid2
Slco1c1
Lbp
Pqlc1
Abcb1
Drd4
Vps4a
Hnrnpk
Slco2a1
Abca5
Abca7
K7ep34
Sstr4
Msr1
Abca6
Apol6
Crhr1
Plscr5
Abca12
Abca9
Prkn
Atp5pf
Ano3
Nmur2
Slc10a7
Atp8b2
Slc4a1
Pla2r1
Spx
Relch
Slc22a9
Slco1a2
Cfhr4
C1qtnf1
Abcc1
Nme4
Ucn
Stx12
Ptch1
Stard5
Atp8a2
Osbp2
Abcc3
Abcc4
Slco1b3
Serpina5
Galr1
Xkr8
Itgb3
Scarb2
Tnfsf11
Atp10b
Abca13
Nmb
Plscr4
Eprs
Gdf9
Atp10a
Apold1
Spns3
Tmem30cp
Abcg5
Abcg8
Anxa2
Cry1
Syt7
Atp9a
Ano4
Aqp9
Loc400499
Atp11c
Ren
Xkr6
Xkr7
Xkr9
Apol3
Thbs1
Atp8b3
Atp10d
Mfsd2b
Tmem30b
Abca10
Selenom
Atp11a
Slc25a20
Nkx3-1
Itgav
A0a0a6yyj9
Slco1b7
Ano6
Slc10a6
Ntsr1
Slc10a1
Kdm5b
Gltpd2
Pdzd8
Slco1b1
Tnfrsf11a
Myb
Stard6
U3kqg8
U3kqe9
Tmf1
Nos2
Drd2
Prelid3b
Lrp6
Vps51
Prelid3a
Slc10a2
Anxa2p2
Tmem30a
Ace
Syk
Vamp7
Retn
Apoo
Slc51b
Kcnn4
Pitpnc1
Prelid1
Gulp1
Plekha8p1
Spns1

## Sheet: Supplementary Table 4
DEGs p-value + Lipid
Fa2h
Rpe65
Mecr
Ip6k3
Ugt8a
Tyrp1
Enpp6
Edn1
Plp1
Wnt10b
Plcl1
Arf3
Nmb
Slc44a1
Cpne1
Retn
Echdc2
Spx
Prkcd
Tmem86b
B3galt2
Rbp4
Pip5kl1
Aspg
Acad8
Dhcr24
Ucn
Rbp2
Asah2
Tm6sf2
Mbtps2
Crabp2
Smpd3
Fabp4
Spp1
Ano3
Cyp1a2
Cyp1b1
Sult1a1
Pafah1b3
Htr2a
Elovl7
Pip4k2a
Pcsk9
Abcd2
Nus1
St8sia3
Qki
Prelid3a
Fasn
Pigk
Myo5a
Snai2
Dkkl1
Tecrl
Scarf1
Prox1
Pld4
Acot8
Pafah2
Wwox
Ppm1l
Sphk1
Pik3r4
Pla2g5
Plcb1
Anxa2
Serinc2
Naaa
Abca2
Nr4a3
Npc1
Thnsl2
Ano4
Klf4
Ptgr1
Bcl11b
Apoa2
Sqle
B4galnt2
Sptssb
Enpp2
Cd74
Slc44a3
Abca7
Flt3
Ccdc3
Plcd4
Alox5
Socs5
Lepr
Stard4
Gramd1b
Idi2
Srebf2
Mboat2
Rbp1
Slc16a11
Slc44a4
Naa40
Pck2
Prkce
Apoa1
Slc45a3
Fdxr
Tiam2
Pdgfb
Aloxe3
Sgpp2
Itgb8
Mt3
Ttr
Hsd11b1
Osbpl8
Dgke
Fmc1
Pnpla7
Ldlr
Mtmr7
Pikfyve
Mapk3
Atp8a2
Degs1
Atp8b3
